# Supplementary material for: Porous hierarchical nickel nanostructures and their application as a magnetically separable catalyst
Source: Royal Society of Chemistry journal article supplement (doi:10.1039/c2jm30361b), 2012-01-01
Supplement: c2jm30361b.pdf [file c2jm30361b.pdf]

## Electronic Supplementary Information

### Porous Hierarchical Nickel Nanostructures and their Application as Magnetically Separable Catalyst

Jingfang Xiong, Hu Shen, Junxian Mao, Xingtai Qin, Pei Xiao, Xizhang Wang, Qiang Wu,\*  
and Zheng Hu

Key Laboratory of Mesoscopic Chemistry of MOE and Jiangsu Provincial Lab for  
Nanotechnology, School of Chemistry and Chemical Engineering, Nanjing University,  
Nanjing, 210093 (China)  
E-mail: wqchem@nju.edu.cn.

#### Index

SI-1. FTIR spectrum of the nanostructured precursor

SI-2. Two control experiments

SI-3. Characterizations on the porous NiO microflowers

SI-4. Typical SEM image of Ni-335°C sample

SI-5. In situ DTG curves and MS spectra in calcining the precursors in Ar and air

SI-6. Magnetic properties of the Ni nanostructures

SI-7. Characterization on Ni-335°C catalyst after reaction

Reference

### SI-1. FTIR spectrum of the nanostructured precursor

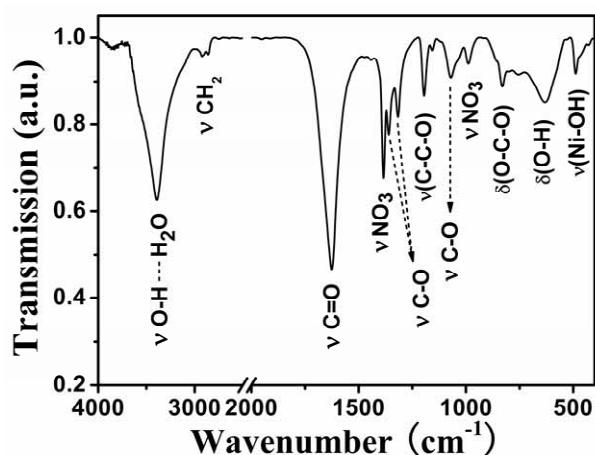

Fig. S1 FTIR spectrum of the flowerlike precursor.

**$\alpha$ -Ni(OH)<sub>2</sub>:** The bands at ca. 3393 cm<sup>-1</sup>, 633 cm<sup>-1</sup> and 488 cm<sup>-1</sup> could be assigned to the  $\nu$ (O-H),  $\delta$ (O-H) and  $\nu$ (Ni-OH) vibrations of Ni(OH)<sub>2</sub>, respectively.<sup>1-3</sup> No sharp peak at ca. 3600 cm<sup>-1</sup> is observed, suggesting the absence of  $\beta$ -Ni(OH)<sub>2</sub>.<sup>4</sup> In combination with the XRD result (Fig. 1d in the main text), it is learnt the nickel hydroxide presents as  $\alpha$ -Ni(OH)<sub>2</sub>.

**NiC<sub>2</sub>O<sub>4</sub>:** The bands at 1620 cm<sup>-1</sup>, 829 cm<sup>-1</sup> and 1193 cm<sup>-1</sup> could be assigned to the asymmetric  $\nu$ (C=O) and  $\delta$ (O-C-O), and the symmetric  $\nu$ (C-C-O) vibrations of NiC<sub>2</sub>O<sub>4</sub>, respectively. The bands at 1358 cm<sup>-1</sup> and 1315 cm<sup>-1</sup> could be ascribed to the symmetric  $\nu$ (C-O) vibrations, which suggest the bridging oxalates are coordinated to nickel atoms with all four oxygen atoms.<sup>5</sup>

**HCHO:** Two peaks centered at ca. 2925 cm<sup>-1</sup> and 2850 cm<sup>-1</sup> as well as the peak at 1070 cm<sup>-1</sup> could be ascribed to the  $\nu$ (CH<sub>2</sub>) and  $\nu$ (C-O) vibrations, in accordance with the standard IR spectrum of HCHO.

**NO<sub>3</sub><sup>-</sup>:** The sharp bands at 1385 cm<sup>-1</sup> and 989 cm<sup>-1</sup> could validate the presence of NO<sub>3</sub><sup>-</sup>.<sup>2,6</sup>

### SI-2. Two control experiments

To learn the formation of the nanostructured Ni-based precursor, two control experiments were carried out. Briefly, only H<sub>2</sub>C<sub>2</sub>O<sub>4</sub>·2H<sub>2</sub>O or hexamethylenetetramine (HMT) was used as the precipitator to prepare two control precursors while keeping the other preparation conditions the same as that for preparing the precursor in the main text. TEM images and XRD patterns show that the control precursor with H<sub>2</sub>C<sub>2</sub>O<sub>4</sub>·2H<sub>2</sub>O precipitator is the microsized particles of NiC<sub>2</sub>O<sub>4</sub>·2H<sub>2</sub>O (Fig. S2a, c), whereas that with HMT precipitator is the flowerlike Ni(OH)<sub>2</sub> (both  $\alpha$ - and  $\beta$ - phase) microspheres with sparse cores (Fig. S2b, d). We noted that the formation of NiC<sub>2</sub>O<sub>4</sub>·2H<sub>2</sub>O started at ca. 80 °C; while that of Ni(OH)<sub>2</sub> was obviously more difficult, i.e., at ca. 100 °C after about 10 min reflux of the reaction solution. Thus, in comparison with the morphology and components of the precursor microflowers in Fig. 1 (see the main text), it is learnt that the precursor microflowers in Fig. 1a are made of the solid cores of NiC<sub>2</sub>O<sub>4</sub>·2H<sub>2</sub>O and the petal-like shells of  $\alpha$ -Ni(OH)<sub>2</sub>. The formation of the precursor microflowers should like this: NiC<sub>2</sub>O<sub>4</sub> particles were formed at the temperature

above 80 °C through the reaction between  $\text{Ni}(\text{NO}_3)_2$  and  $\text{H}_2\text{C}_2\text{O}_4 \cdot \text{H}_2\text{O}$ . When the temperature was further raised to 100 °C, HMT was hydrolyzed gradually into  $\text{NH}_3$  and  $\text{HCHO}$ , and then  $\text{NH}_3 \cdot \text{H}_2\text{O}$  reacted with  $\text{Ni}^{2+}$  to produce  $\alpha\text{-Ni}(\text{OH})_2$  microflowers based on the nuclei of  $\text{NiC}_2\text{O}_4$  particles similar to the case in the literature.<sup>3</sup>

The  $\text{HCHO}$  molecules and  $\text{NO}_3^-$  ions in the Ni-based precursor (see Fig. S1) were mainly intercalated into the  $\alpha\text{-Ni}(\text{OH})_2$  with layered structure,<sup>3</sup> as revealed by the follow experiments. By calcining the control precursor of the flowerlike  $\text{Ni}(\text{OH})_2$  in Ar at 340 °C,  $\text{NiO}$  and  $\text{Ni}$  were obtained (Fig. S2e). This indicates the existence of some reducer in the control precursor; otherwise only  $\text{NiO}$  would be obtained from the decomposition of  $\text{Ni}(\text{OH})_2$ . According to the preparation of the control precursor, the reducer should be  $\text{HCHO}$  molecules from the hydrolysis of HMT, which is confirmed by the detected species of  $\text{CO}^+$  (28 amu) and  $\text{CO}_2^+$  (44 amu) during the in situ TG-DSC-MS analysis on the pyrolysis of the control precursor in Ar (inset in Fig. S2e). The  $\text{NO}^+$  (30 amu) signal was also detected (inset in Fig. S2e), which came from the decomposition of the intercalated  $\text{NO}_3^-$ .

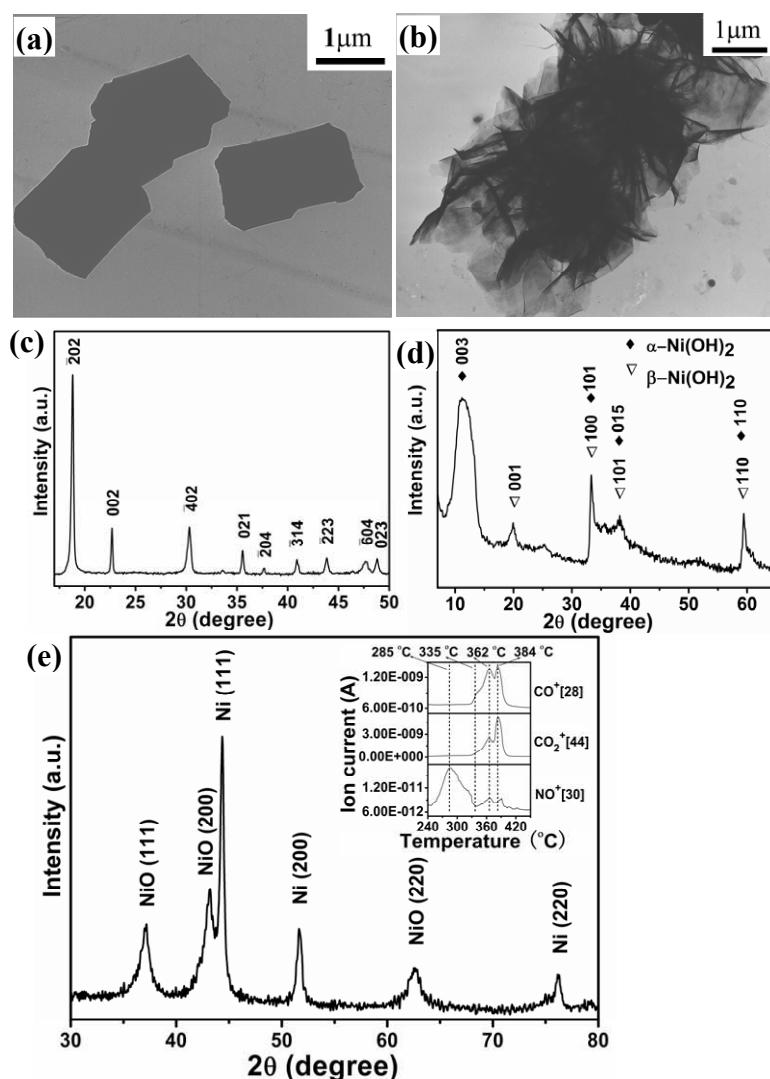

**Fig. S2** TEM images and XRD patterns of the control precursors using only oxalic acid (a, c) or HMT (b, d) as the precipitator. (e) XRD pattern of the product obtained by heat-treating the control precursor in (b, d) in Ar at 340 °C. Inset is the detected  $\text{CO}^+$  (28 amu),  $\text{CO}_2^+$  (44 amu)

and  $\text{NO}^+$  (30 amu) species during the in situ TG-DSC-MS analysis on the pyrolysis of this control precursor in Ar.

### SI-3. Characterizations on the porous NiO microflowers

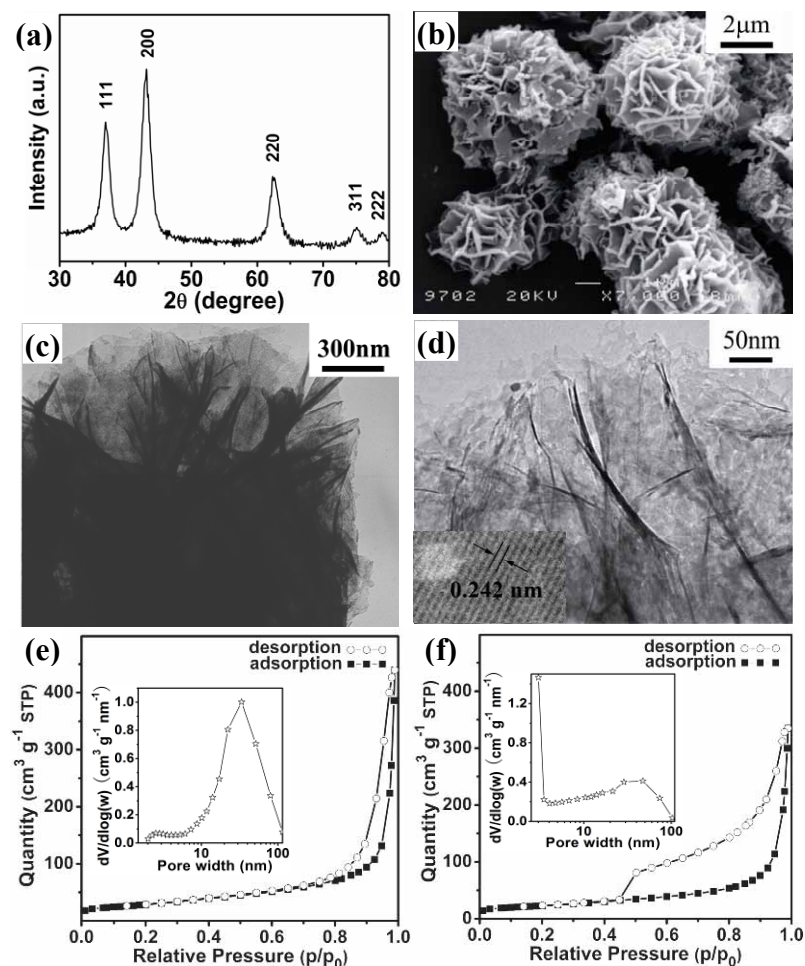

**Fig. S3** (a) XRD pattern, (b) SEM image, (c, d) TEM images and (e)  $\text{N}_2$  adsorption-desorption isotherms and pore size distribution curve (inset) of the NiO porous microflowers, Inset in (d) is the corresponding HRTEM image, small pores can be clearly observed in the sheets. (f)  $\text{N}_2$  adsorption-desorption isotherms and pore size distribution curve (inset) of the precursor for comparison

All the diffraction peaks can be indexed to NiO (JCPDS no. 47-1049), indicating the flowerlike Ni-based precursor is completely decomposed in air, giving rise to the highly pure NiO product (Fig. S3a). The microflowers consist of the stacked porous thin nanosheets with the sheet-thickness of several nanometers and the wide pore width mainly in range of 5~100 nm, and the distance between two neighboring fringes is about 0.242 nm in well accordance with the  $d_{111}$  value of cubic NiO (Fig. S3b-e). The BET surface area and pore volume of the porous NiO microflowers are  $101.8 \text{ m}^2 \text{ g}^{-1}$  and  $0.7 \text{ m}^3 \text{ g}^{-1}$  respectively, larger than the corresponding ones of the Ni-based precursor (Table S1). These result from the formation of

the abundant pores with the width mainly in the range of 5~100 nm on the sheet surface, as revealed by the pore size distribution curves (insets of Fig. S3e, f).

**Table S1.** BET surface area and pore structure parameters from the N<sub>2</sub> adsorption/desorption experiments.

| Samples            | BET surface area [m <sup>2</sup> g <sup>-1</sup> ] | Average pore width [nm] | Pore volume [m <sup>3</sup> g <sup>-1</sup> ] |
|--------------------|----------------------------------------------------|-------------------------|-----------------------------------------------|
| Ni-based Precursor | 81.0                                               | 8.2                     | 0.5                                           |
| NiO-340°C          | 101.8                                              | 20.2                    | 0.7                                           |
| Ni-335°C           | 24.5                                               | 20.1                    | 0.1                                           |
| Ni-400°C           | 2.9                                                | 22.2                    | 0.02                                          |

#### SI-4. Typical SEM image of Ni-335°C sample

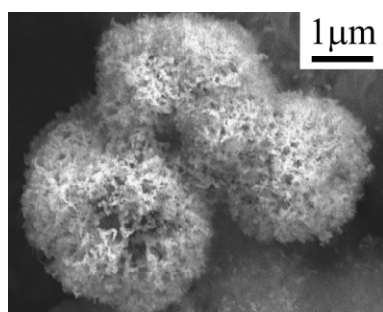

**Fig. S4** SEM images of Ni-335°C. The morphology of Ni-335°C is similar to the corresponding precursor shown in Figure 1c.

#### SI-5. In situ DTG curves and MS spectra in calcining the precursors in Ar and air

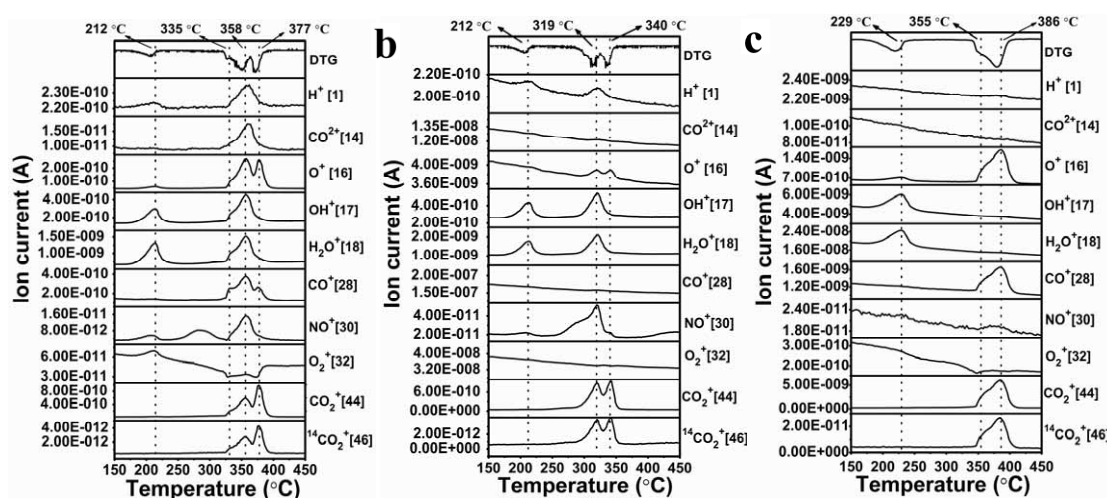

**Fig. S5** MS spectra and DTG curves in situ recorded in the calcination process of the Ni-based precursor in Ar (a) and air (b). For comparison, similar experiment was also performed

for the control precursor of  $\text{NiC}_2\text{O}_4 \cdot 2\text{H}_2\text{O}$  in Ar (c). The species with amu of 1, 17 and 18 come from  $\text{H}_2\text{O}$ ; 44 and 46 from  $\text{CO}_2$  ( $^{14}\text{CO}_2$ ); 16 from O of CO and  $\text{CO}_2$  (complicated by  $\text{O}^+$  from NO and  $\text{O}_2^{2+}$  from  $\text{O}_2$ ); 32 from  $\text{O}_2$ ; 14 and 28 from CO (14 complicated by  $\text{N}^+$  from NO); 30 from NO (complicated by  $^{14}\text{CO}^+$  in 355~377 °C).

In Ar, the signals around 212 °C result from the release of the crystal water and the slight decomposition of  $\text{NO}_3^-$  intercalated in  $\text{Ni}(\text{OH})_2$  layers, as reflected by the ion peaks for  $\text{H}_2\text{O}$  (1, 17, 18 amu), and a little NO (30 amu) and  $\text{O}_2$  (32 amu), respectively. In 325~390 °C, there are two evident peaks in DTG curve. The first one at 358 °C with a shoulder around 335 °C should come from the reduction of  $\text{Ni}(\text{OH})_2$  by the intercalated HCHO, i.e.,

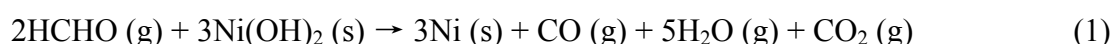

as supported by the detected  $\text{H}_2\text{O}$ , CO ( $^{14}\text{CO}^+$ ) (14, 16, 28, 30 amu) and  $\text{CO}_2$  (16, 44, 46 amu) (Fig. S5a). The peak around 377 °C is attributed to the decomposition of  $\text{NiC}_2\text{O}_4$ , i.e.,

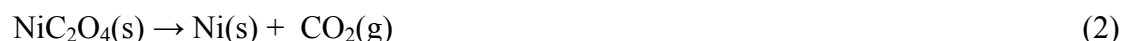

as supported by the detected  $\text{CO}_2$  and the accompanied CO species, as well as the absence of  $\text{H}_2\text{O}$ . Actually, we can not exclude the possibility that CO may partially come from the consecutive two-step decomposition of  $\text{NiC}_2\text{O}_4$ , i.e.,

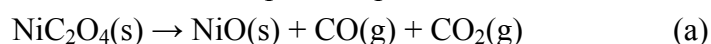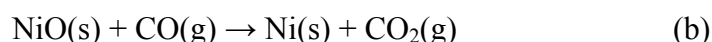

In this case, CO from the pyrolysis of oxalate (a) also makes the contribution to the formation of the Ni product (b). The negative peak of  $\text{O}_2$  (32 amu) is associated with the consumption of the trace  $\text{O}_2$  by HCHO and/or CO. It is noted that the decomposition of the control precursor of  $\text{NiC}_2\text{O}_4 \cdot 2\text{H}_2\text{O}$  shows a peak starting at 343 °C in the DTG curve (Fig. S5c). Therefore, the first peak in Fig. S5a (at 358 °C with a shoulder around 335 °C) might also be partially contributed from the decomposition of  $\text{NiC}_2\text{O}_4$ . Hence, the reduction of Ni (II) by reductive HCHO and/or CO in Ar contributed to the formation of Ni nanostructures (see Fig. 3 in the main text).

In air, similar results are obtained except for the whole shift of the ion peaks to the low-temperature side in the range of 293~348 °C, and the absence of the CO species and the negative ion peak for  $\text{O}_2$  due to the abundant  $\text{O}_2$ . The two peaks in DTG curve mainly come from the following reactions, i.e.,

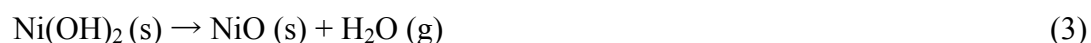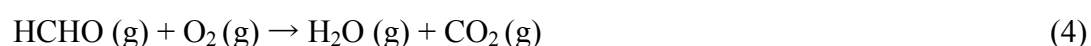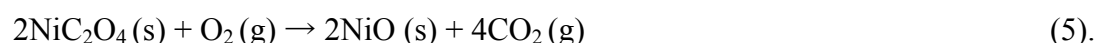

As shown in Fig. S5b, the first peak at 319 °C comes from the decomposition of  $\text{Ni}(\text{OH})_2$  (Reaction 3), the oxidation of the intercalated HCHO (Reaction 4) and the decomposition of the intercalated  $\text{NO}_3^-$  producing NO and  $\text{O}_2$ , as supported by the corresponding MS peaks for  $\text{H}_2\text{O}$ ,  $\text{CO}_2$  and NO. The second peak at 340 °C is from the decomposition of  $\text{NiC}_2\text{O}_4$  in the



presence of O<sub>2</sub> (Reaction 5). Hence, the decomposition of Ni(OH)<sub>2</sub> and NiC<sub>2</sub>O<sub>4</sub> in air generated the NiO nanostructures (Fig. S3).

By comparing the cases in Ar and air, it is learnt that Ni is generated in Ar, and NiO in air. In detail:

(1) Below 212 °C, the same process occurred for the precursor in Ar and air, i.e., the crystal water was released accompanied by the slight decomposition of the NO<sub>3</sub><sup>-</sup> intercalated in Ni(OH)<sub>2</sub> layers, leading to a weight loss of ~6.8% (see Fig. 2 in the main text).

(2) In both Ar and air, the decomposition of the intercalated NO<sub>3</sub><sup>-</sup> ions occurred in a wide temperature range as learned from the detected NO molecules.

(3) In Ar, Ni species was generated from the reduction of Ni (II) by HCHO and/or CO with releasing CO, CO<sub>2</sub> and H<sub>2</sub>O (Reaction 1 and 2. Reaction 2 may also occur by consecutive two steps). In air, NiO species was generated from the decomposition of Ni(OH)<sub>2</sub> and NiC<sub>2</sub>O<sub>4</sub>, with releasing CO<sub>2</sub> and H<sub>2</sub>O (Reaction 3-5).

### SI-6. Magnetic properties of the Ni nanostructures

**Table S2.** Saturation magnetization (M<sub>s</sub>), remanent magnetization (M<sub>r</sub>) and coercivity (H<sub>c</sub>) of Ni-335°C and Ni-400°C.

| Samples  | M <sub>s</sub> [emu g <sup>-1</sup> ] | M <sub>r</sub> [emu g <sup>-1</sup> ] | H <sub>c</sub> [Oe] |
|----------|---------------------------------------|---------------------------------------|---------------------|
| Ni-335°C | 40.2                                  | 16.5                                  | 192.9               |
| Ni-400°C | 51.9                                  | 13.2                                  | 142.4               |

### SI-7. Characterization on Ni-335°C catalyst after reaction

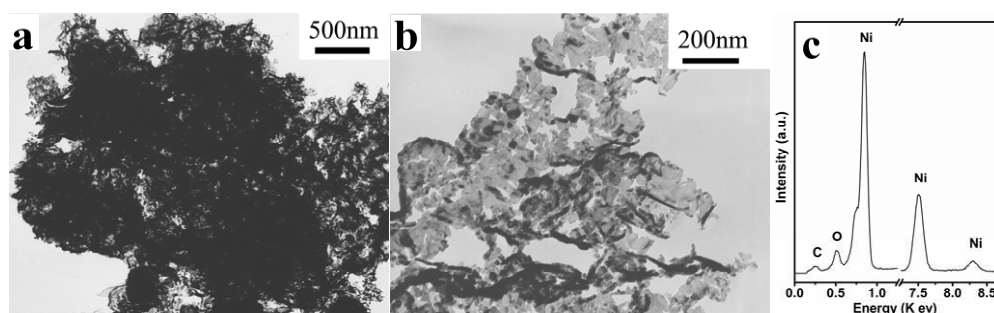

**Fig. S6** (a, b) TEM images of the Ni-335°C catalyst magnetically separated from the reaction system after 8 cycles. It is shown the morphology was roughly remained. (c) the corresponding EDX spectrum. C comes from the conductive gel and O from the surface oxidation.

Ni-335°C catalyst was analyzed by inductively coupled plasma mass spectrometry (ICP-MS, ELAN9000) before and after 1 and 6 cycles' reaction, giving the Ni content of 97.2%, 93.4% and 94.3%, respectively. These values are within the error range of ICP-MS analysis.

This implies that the surface of the porous Ni nanostructures was stabilized by oxide layer and no obvious change occurred during the catalytic reaction, which is actually the reason for the superb recycling stability.

These characterization results indicate the high stability of the porous hierarchical Ni nanostructures.

## Reference

- 1 P. Jeevanandam, Y. Kolytyn and A. Gedanken, *Nano Lett.*, 2001, **1**, 263-266.
- 2 G. T. Duan, W. P. Cai, Y. Y. Luo and F. Q. Sun, *Adv. Funct. Mater.*, 2007, **17**, 644-650.
- 3 L. P. Xu, Y. S. Ding, C. H. Chen, L. L. Zhao, C. Rimkus, R. Joesten and S. L. Suib, *Chem. Mater.*, 2008, **20**, 308-316.
- 4 C. Tessier, L. Guerlou-Demourgues, C. Faure, A. Demourgues and C. Delmas, *J. Mater. Chem.*, 2000, **10**, 1185-1193.
- 5 M. A. Gabal, A. A. El-Bellihi and S. S. Ata-Allah, *Mater. Chem. Phys.*, 2003, **81**, 84-92.
- 6 G. R. Fu, Z. A. Hu, L. J. Xie, X. Q. Jin, Y. L. Xie, Y. X. Wang, Z. Y. Zhang, Y. Y. Yang and H. Y. Wu, *Int. J. Electrochem. Sci.*, 2009, **4**, 1052-1062.
